# Supplementary material for: Are trends in billing for high-intensity emergency care explained by changes in services provided in the emergency department? An observational study among US Medicare beneficiaries
Source: PubMed Central journal article supplement — BMJ Open. 2018 Jan 30;8(1):e019357. doi: 10.1136/bmjopen-2017-019357 (PMC5829666; doi:10.1136/bmjopen-2017-019357), 2018-01-30
Supplement: bmjopen-2017-019357supp001.pdf [file bmjopen-2017-019357supp001.pdf]

**Appendices for “Trends in High-Intensity Billing for Emergency Care Accompanied by an Increase in Services Provided in the Emergency Department”**

**Appendix 1.** Proportion of Outpatient Emergency Department Visits Billed as High-Intensity Visits by Diagnosis Category

**Appendix 2.** Trends in Billing\* for High-Intensity Emergency Care

**Appendix 3.** Unadjusted Rate of Emergency Department Visits per 1,000 Medicare\* Beneficiaries Overall and Stratified by Intensity

**Appendix 4.** Trends\* in the Most Common Services† among Admitted Patients

**Appendix 5.** Trends\* in the Most Common Services† among Patients Discharged from the ED

**Appendix 6.** Ten Most Frequent Physician Services by Year

**Appendix 7.** Absolute Change in Proportion of High-Intensity Visits versus Baseline Proportion of High-Intensity Visits by Diagnosis Category for Outpatient Emergency Department Visits

**Appendix 8.** Comparison of Observed versus Expected Number of High-Intensity Visits in 2006 Using Multivariable Modeling

**Appendix 1. Proportion of Outpatient Emergency Department Visits Billed as High-Intensity Visits\* by Diagnosis Category<sup>†</sup>**

|    |                                                                     | 2006  | 2009  | 2012  | Absolute Change, %<br>(95% CI) |
|----|---------------------------------------------------------------------|-------|-------|-------|--------------------------------|
| 1  | Minor injuries                                                      | 8.5%  | 14.4% | 20.5% | 12.2 (11.6 to 12.9)            |
| 2  | Major injuries                                                      | 34.0% | 42.3% | 51.7% | 17.7 (14.8 to 20.6)            |
| 3  | Other injuries                                                      | 7.3%  | 12.3% | 18.9% | 12.0 (11.5 to 12.5)            |
| 4  | Symptoms: abdominal pain                                            | 31.3% | 44.0% | 52.4% | 21.0 (20.1 to 22.0)            |
| 5  | Symptoms: chest pain                                                | 65.2% | 77.5% | 82.4% | 17.2 (16.4 to 17.9)            |
| 6  | Symptoms: dizziness, vertigo, and syncope                           | 42.9% | 57.3% | 66.1% | 23.0 (22.1 to 23.8)            |
| 7  | Symptoms: headache                                                  | 21.7% | 30.5% | 39.7% | 17.9 (16.3 to 19.5)            |
| 8  | Other symptoms                                                      | 25.3% | 35.7% | 44.1% | 18.8 (17.9 to 19.7)            |
| 9  | Upper respiratory infections                                        | 12.8% | 20.5% | 27.6% | 14.7 (13.5 to 15.9)            |
| 10 | Intestinal infections                                               | 28.1% | 40.1% | 53.3% | 25.2 (20.8 to 29.6)            |
| 11 | Urinary tract infection                                             | 18.4% | 27.3% | 34.1% | 15.9 (15.0 to 16.9)            |
| 12 | Other infectious and parasitic diseases                             | 12.6% | 20.4% | 23.6% | 11.0 (9.1 to 12.9)             |
| 13 | Skin and subcutaneous infection                                     | 5.9%  | 10.0% | 13.6% | 7.8 (6.4 to 9.3)               |
| 14 | Endocrine, nutritional; immunity and metabolic disorders            | 29.0% | 38.7% | 45.8% | 16.8 (15.6 to 18.0)            |
| 15 | Diabetes mellitus                                                   | 25.3% | 33.5% | 40.5% | 15.0 (13.3 to 16.6)            |
| 16 | Hypertension                                                        | 24.4% | 35.1% | 41.4% | 16.9 (15.6 to 18.3)            |
| 17 | Nonatherosclerotic heart disease                                    | 61.2% | 71.3% | 78.3% | 17.0 (14.6 to 19.4)            |
| 18 | Dysrhythmias                                                        | 52.7% | 65.4% | 72.4% | 19.6 (18.4 to 20.9)            |
| 19 | Ischemic heart disease                                              | 75.8% | 82.6% | 86.7% | 11.0 (9.0 to 12.9)             |
| 20 | Congestive heart failure                                            | 57.2% | 68.7% | 75.8% | 18.3 (16.5 to 20.1)            |
| 21 | Circulatory disorders                                               | 25.0% | 35.6% | 40.8% | 15.8 (14.2 to 17.4)            |
| 22 | Cerebrovascular disease                                             | 63.4% | 74.5% | 80.5% | 16.8 (15.0 to 18.5)            |
| 23 | Diseases of the blood                                               | 32.3% | 43.7% | 50.1% | 17.7 (15.2 to 20.3)            |
| 24 | Neoplasms                                                           | 32.9% | 47.1% | 49.0% | 16.0 (12.7 to 19.4)            |
| 25 | Mental illness                                                      | 27.1% | 36.5% | 43.9% | 16.8 (15.5 to 18.1)            |
| 26 | Nervous system disorders                                            | 23.5% | 31.4% | 36.0% | 12.4 (11.4 to 13.5)            |
| 27 | Pneumonia                                                           | 36.6% | 52.0% | 57.6% | 20.9 (19.1 to 22.6)            |
| 28 | Other respiratory disease                                           | 27.3% | 35.6% | 42.4% | 15.1 (14.2 to 16.0)            |
| 29 | Chronic obstructive pulmonary disease                               | 31.6% | 43.0% | 52.4% | 20.6 (19.5 to 21.8)            |
| 30 | Asthma                                                              | 28.5% | 38.8% | 48.3% | 19.5 (16.9 to 22.1)            |
| 31 | Noninfectious lung disease                                          | 44.0% | 60.2% | 62.9% | 18.8 (15.0 to 22.7)            |
| 32 | GI system diseases                                                  | 21.7% | 32.2% | 38.4% | 16.7 (16.0 to 17.4)            |
| 33 | Other renal and GU diseases                                         | 11.5% | 18.3% | 24.1% | 12.6 (11.6 to 13.6)            |
| 34 | End-stage renal disease                                             | 7.1%  | 10.1% | 25.4% | 17.8 (-3.2 to 38.9)            |
| 35 | Chronic renal disease                                               | 47.4% | 61.9% | 66.1% | 18.6 (14.3 to 23.0)            |
| 37 | Diseases of the musculoskeletal system, skin, and connective tissue | 10.3% | 16.0% | 21.4% | 11.1 (10.5 to 11.7)            |
| 38 | Complications and adverse events                                    | 10.5% | 15.0% | 18.3% | 7.8 (6.4 to 9.3)               |
| 39 | Other residual codes                                                | 21.2% | 33.7% | 36.1% | 14.9 (13.8 to 16.1)            |

\* Proportions of high-intensity visits are estimated using logistic regression adjusted for patient age, sex, Medicaid eligibility and race. The absolute change is estimated using linear regression.

† Categories defined by Gabayan, G.Z., et al *Annals of emergency medicine* 2011;58(6):551-58 e2). Category 36, pregnancy and childbirth related disorders, is omitted as it is not applicable to the elderly, Medicare population.

**Appendix 2. Trends\* in Billing for High-Intensity Emergency Care**

|                                                                     |       | 2006   | 2009   | 2012   | Trend, % change per year<br>(95% CI) | P-Value |
|---------------------------------------------------------------------|-------|--------|--------|--------|--------------------------------------|---------|
| <b>Proportion of ED<br/>Visits by Intensity<br/>Level CPT Code‡</b> | 99281 | 0.60%  | 0.40%  | 0.40%  | -0.03 (-0.04 to -0.03)               | <.001   |
|                                                                     | 99282 | 3.70%  | 2.60%  | 2.00%  | -0.30 (-0.31 to -0.29)               | <.001   |
|                                                                     | 99283 | 22.20% | 17.50% | 14.80% | -1.25 (-1.27 to -1.22)               | <.001   |
|                                                                     | 99284 | 27.10% | 25.60% | 24.70% | -0.42 (-0.45 to -0.40)               | <.001   |
|                                                                     | 99285 | 39.70% | 45.90% | 49.40% | +1.60 (1.57 to 1.63)                 | <.001   |
|                                                                     | 99291 | 5.00%  | 6.60%  | 7.60%  | +0.40 (0.39 to 0.41)                 | <.001   |
|                                                                     | 99292 | 0.70%  | 0.80%  | 0.70%  | +0.004 (-0.0003 to 0.009)            | .07     |

\* Longitudinal linear regression models were used to estimate the time trends, adjusting for patient age, race, sex, and Medicaid coverage. The yearly estimates were based on binomial regression using generalized estimating equations to adjust for clustering at the level of the emergency department.

‡Current Procedural Terminology Healthcare Common Procedure Coding System codes 99281-99285 denote increasing levels of intensity of emergency physician evaluation and management. Codes 99291 and 99292 indicate critical care services were provided.

**Appendix 3. Unadjusted Rate of Emergency Department Visits per 1,000 Medicare\* Beneficiaries Overall and Stratified by Intensity**

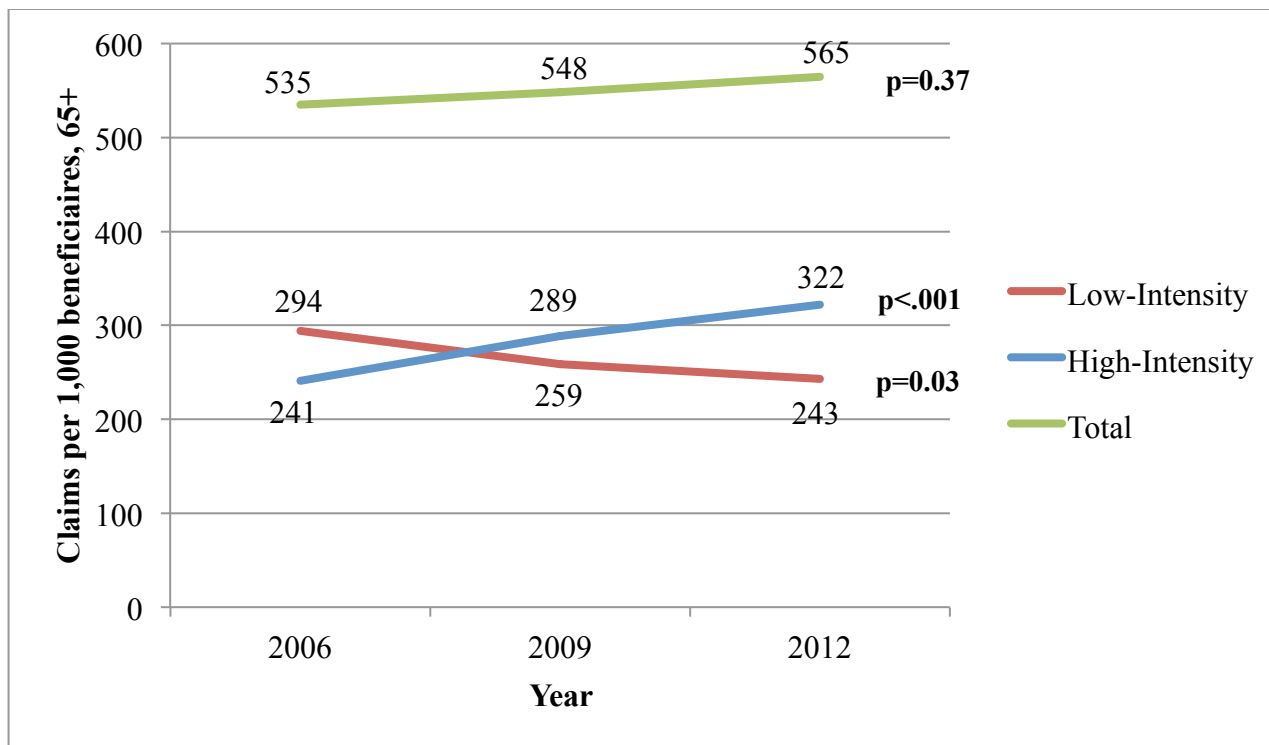

\*Traditional Medicare beneficiaries age 65 and over with continuous coverage during the year.

**Appendix 4. Trends\* in the Most Common Services† among Admitted Patients**

| Service                                                 | 2006 (%)‡ | 2009 (%) | 2012 (%) | Absolute Change/Year, %<br>(95% CI)§ |
|---------------------------------------------------------|-----------|----------|----------|--------------------------------------|
| Blood transfusion                                       | 12.4      | 14.3     | 15.4     | +0.52 (0.48 to 0.56)                 |
| Diagnostic cardiac catheterization                      | 10.4      | 9.3      | 9.7      | -0.11 (-0.16 to -0.06)               |
| Respiratory intubation and mechanical ventilation       | 9.9       | 11.1     | 12.6     | +0.45 (0.41 to 0.49)                 |
| Other vascular catheterization; not heart               | 7.6       | 8.9      | 10.0     | +0.41 (0.38 to 0.44)                 |
| Upper gastrointestinal endoscopy; biopsy                | 6.5       | 6.1      | 5.9      | -0.11 (-0.13 to -0.08)               |
| Other therapeutic procedures                            | 5.8       | 5.7      | 7.1      | +0.21 (0.18 to 0.24)                 |
| Other OR procedures on vessels other than head and neck | 4.7       | 4.7      | 6.2      | +0.24 (0.21 to 0.27)                 |
| Hemodialysis                                            | 5.9       | 6.3      | 6.5      | +0.10 (0.08 to 0.12)                 |
| Colonoscopy and biopsy                                  | 3.2       | 2.8      | 2.6      | -0.11(-0.13 to -0.10)                |
| Diagnostic ultrasound of heart (echocardiogram)         | 2.9       | 3.4      | 4.0      | +0.17 (0.16 to 0.19)                 |

\* Longitudinal linear regression models were used to estimate the time trends, adjusting for patient age, race, sex, and Medicaid coverage. The adjusted yearly estimates were based on binomial regression, using generalized estimating equations.

† Most common services among patients admitted from the ED occurring in the ED or during an inpatient stay. Services were defined by ICD9 procedure codes and categorized using the Clinical Classifications Software for Services and Procedures software.

‡ Percentage of all admissions including the service.

§ All changes were statistically significant at p<.001

**Appendix 5. Trends\* in the Most Common Services† among Patients Discharged from the ED**

| Service                                                        | 2006 | 2009 | 2012 | Trend, %†<br>(95% CI)     | P-Value |
|----------------------------------------------------------------|------|------|------|---------------------------|---------|
| Laboratory-chemistry and hematology                            | 3.35 | 3.68 | 3.85 | 0.083 (0.080 to 0.086)    | <.001   |
| Medications                                                    | 0.60 | 0.42 | 0.56 | -0.007 (-0.008 to -0.007) | <.001   |
| Other therapeutic procedures                                   | 0.48 | 0.97 | 1.06 | 0.096 (0.095 to 0.097)    | <.001   |
| Microscopic examination (bacterial smear, culture, toxicology) | 0.49 | 0.58 | 0.63 | 0.023 (0.023 to 0.024)    | <.001   |
| Electrocardiogram (ECG)                                        | 0.38 | 0.38 | 0.39 | 0.001 (0.000 to 0.0001)   | .003    |
| Other diagnostic radiology and related techniques              | 0.34 | 0.32 | 0.30 | -0.007 (-0.007 to -0.006) | <.001   |
| Routine chest X-ray                                            | 0.37 | 0.37 | 0.38 | 0.002 (0.002 to 0.003)    | <.001   |
| Other laboratory                                               | 0.17 | 0.19 | 0.22 | 0.008 (0.007 to 0.008)    | <.001   |
| Computerized axial tomography (CT) scan of the head            | 0.14 | 0.17 | 0.18 | 0.006 (0.006 to 0.007)    | <.001   |
| Durable Medical Equipment and supplies                         | 0.10 | 0.18 | 0.26 | 0.026 (0.026 to 0.027)    | <.001   |

\* Services were defined by the Current Procedural Terminology (CPT) Healthcare Common Procedure Coding System codes (HCPCS) and categorized using the Clinical Classifications Software for Services and Procedures software.

† Longitudinal linear regression models were used to estimate the time trends, adjusting for patient age, race, sex, and Medicaid coverage. The adjusted yearly estimates were based on negative binomial regression using generalized estimating equations.

**Appendix 6. Ten Most Frequent Physician Services\* by Year for Emergency Department Visits**

|           | 2006                                              |       | 2009                                              |       | 2012                                                       |       |
|-----------|---------------------------------------------------|-------|---------------------------------------------------|-------|------------------------------------------------------------|-------|
|           | Service                                           | %†    | Service                                           | %     | Service                                                    | %     |
| <i>1</i>  | Electrocardiogram                                 | 63.5% | Electrocardiogram                                 | 64.4% | Electrocardiogram                                          | 67.4% |
| <i>2</i>  | Suture of skin and subcutaneous tissue            | 8.3%  | Suture of skin and subcutaneous tissue            | 8.2%  | Suture of skin and subcutaneous tissue                     | 7.4%  |
| <i>3</i>  | Other therapeutic procedures                      | 6.1%  | Routine chest X-ray                               | 4.1%  | Routine chest X-ray                                        | 3.2%  |
| <i>4</i>  | Routine chest X-ray                               | 3.7%  | Laboratory - Chemistry and Hematology             | 3.3%  | Laboratory - Chemistry and Hematology                      | 3.1%  |
| <i>5</i>  | Other diagnostic radiology and related techniques | 2.2%  | Other diagnostic radiology and related techniques | 2.2%  | Other diagnostic radiology and related techniques          | 1.7%  |
| <i>6</i>  | Laboratory - Chemistry and Hematology             | 1.7%  | Other therapeutic procedures                      | 1.8%  | Traction, splints, and other wound care                    | 1.6%  |
| <i>7</i>  | Control of epistaxis                              | 1.7%  | Control of epistaxis                              | 1.6%  | Other OR therapeutic procedures on nose, mouth and pharynx | 1.6%  |
| <i>8</i>  | Traction, splints, and other wound care           | 1.6%  | Traction, splints, and other wound care           | 1.6%  | Control of epistaxis                                       | 1.4%  |
| <i>9</i>  | Respiratory intubation and mechanical ventilation | 1.5%  | Respiratory intubation and mechanical ventilation | 1.5%  | Other therapeutic procedures                               | 1.4%  |
| <i>10</i> | Other vascular catheterization, not heart         | 1.1%  | Other fracture and dislocation procedure          | 1.3%  | Other fracture and dislocation procedure                   | 1.4%  |

\* Services were defined by the Current Procedural Terminology (CPT) Healthcare Common Procedure Coding System codes (HCPCS) and categorized using the Clinical Classifications Software for Services and Procedures software. Codes for emergency physician evaluation and management codes (99281-99285, 99291, 99292) were excluded.

†Percentage of all physician services in the sample.



**Appendix 7.** Absolute Change\* in Proportion of High-Intensity Visits versus Baseline Proportion of High-Intensity Visits by Diagnosis Category\* for Outpatient Emergency Department Visits†

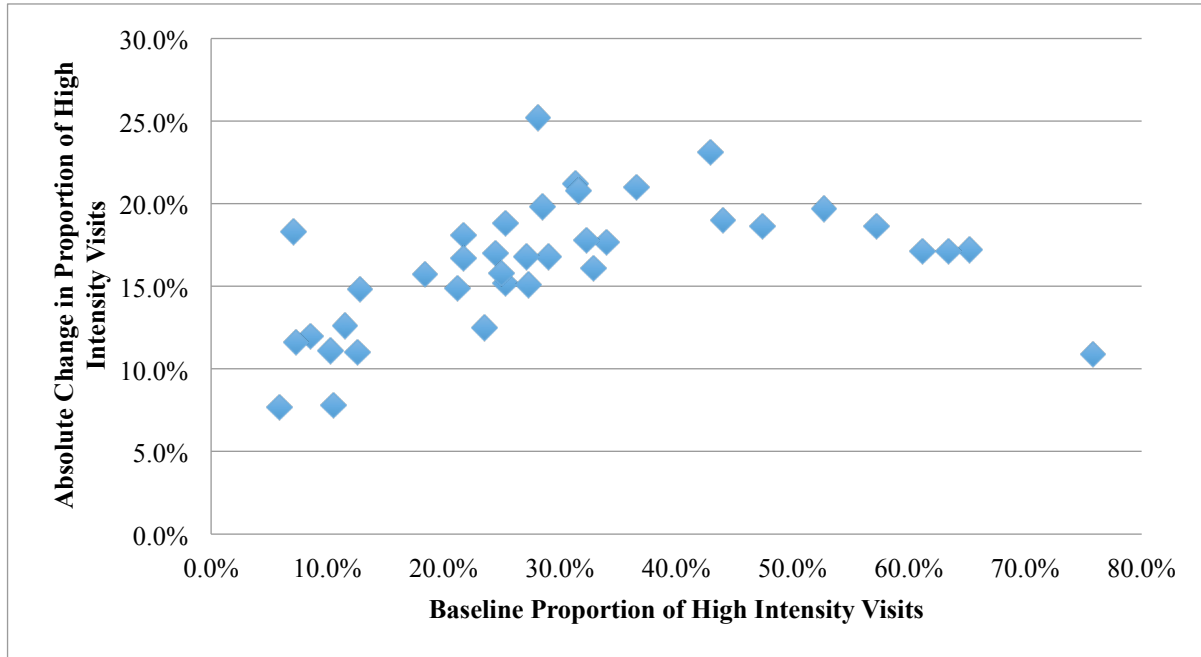

\*Longitudinal linear regression models were used to estimate the time trends, adjusting for patient age, race, sex, and Medicaid coverage. †Thirty-nine diagnosis categories previously defined in the emergency medicine literature (Gabayan, G.Z., et al *Annals of emergency medicine* 2011;58(6):551-58 e2)‡Proportion of high-intensity visits is adjusted for patient age, sex and Medicaid eligibility.

**Appendix 8.** Comparison of Observed versus Expected Number of High-Intensity Visits\* in 2006 Using Multivariable Modeling

|                               | <i>Observed High-Intensity Visits 2006</i> | <b>Using 2009 Regression Coefficients†</b> |                                | <b>Using 2012 Regression Coefficients</b> |                                |
|-------------------------------|--------------------------------------------|--------------------------------------------|--------------------------------|-------------------------------------------|--------------------------------|
|                               |                                            | <i>Predicted High-Intensity‡</i>           | <i>Observed - Expected (%)</i> | <i>Predicted High-Intensity</i>           | <i>Observed - Expected (%)</i> |
| <b>Inpatient (N=261,239)</b>  | 203,344                                    | 228,163                                    | -24,819                        | 238,848                                   | -35,504                        |
| <b>Outpatient (N=409,864)</b> | 98,801                                     | 99,902                                     | -1,101                         | 115,706                                   | -16,905                        |

\* High-intensity visits were defined as visits with an emergency physician professional claim for evaluation and management codes 99285, 99291, and 99292.

† Generalized logistic regression models that accounted for clustering at the level of the ED were run separately for emergency department (ED) visits in 2009 and 2012 incorporating patient age, sex, Medicaid eligibility, race, chronic conditions (Hierarchical Condition Categories). The model also incorporated the number of services billed for the associated facility and physician professional claims (excluding evaluation and management services). Models were run separately for inpatient and outpatient ED visits.

‡ The coefficients for each variable in the regression model were applied to the 2006 data to obtain an expected number of high-intensity visits.

§ The difference between the observed and predicted number of high-intensity visits represents the degree to which high-intensity billing has changed in ways that cannot be explained by the variables in our model.
